# Supplementary material for: iVY: protocol for a randomised clinical trial to test the effect of a technology-based intervention to improve virological suppression among young adults with HIV in the USA
Source: PubMed Central journal article supplement — BMJ Open. 2023 Oct 6;13(10):e077676. doi: 10.1136/bmjopen-2023-077676 (PMC10565330; doi:10.1136/bmjopen-2023-077676), 2023-10-06
Supplement: bmjopen-2023-077676.reviewer_comments.pdf [file bmjopen-2023-077676.reviewer_comments.pdf]

## PEER REVIEW HISTORY

BMJ Open publishes all reviews undertaken for accepted manuscripts. Reviewers are asked to complete a checklist review form (<http://bmjopen.bmj.com/site/about/resources/checklist.pdf>) and are provided with free text boxes to elaborate on their assessment. These free text comments are reproduced below.

## ARTICLE DETAILS

|                            |                                                                                                                                                                                                                   |
|----------------------------|-------------------------------------------------------------------------------------------------------------------------------------------------------------------------------------------------------------------|
| <b>TITLE (PROVISIONAL)</b> | iVY: Protocol for a randomized clinical trial to test the effect of a technology-based intervention to improve virologic suppression among young adults with HIV in the United States                             |
| <b>AUTHORS</b>             | Stoner, Marie; Saberi, Parya; McCuistian, Caravella; Balaban, Celeste; Ming, Kristin; Wagner, L. Danielle; Chakraborty, Bibhas; Smith, Louis; Sukhija-Cohen, Adam; Neilands, Torsten; Gruber, Valerie; Johnson, M |

This article was not externally reviewed at BMJ Open. Protocols that have been independently assessed prior to submission to BMJ Open are usually fast-tracked to publication on the grounds that further substantial changes will not be possible. This independent assessment will usually be external, independent review for both a substantial grant award from a non-commercial or government funder and ethics approval.
